# Supplementary material
Source: PubMed Central journal article supplement (PMC1458794)

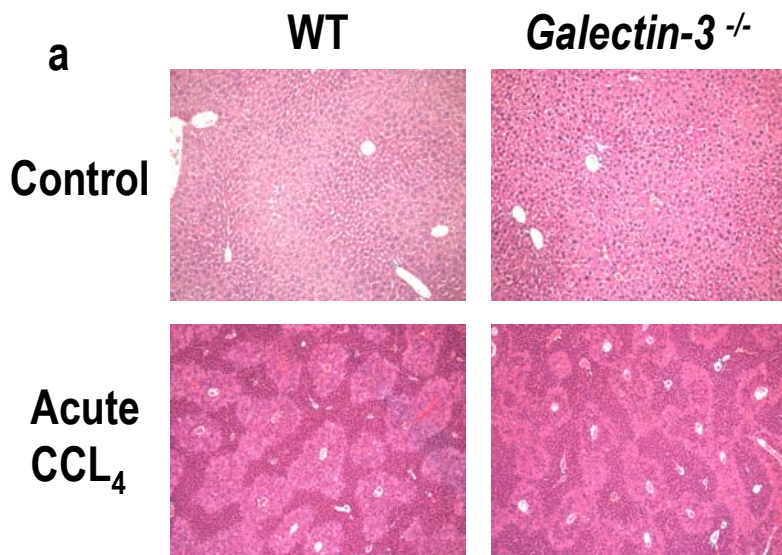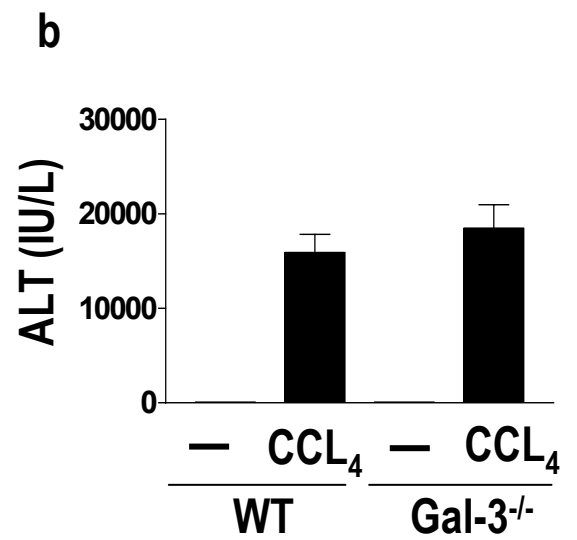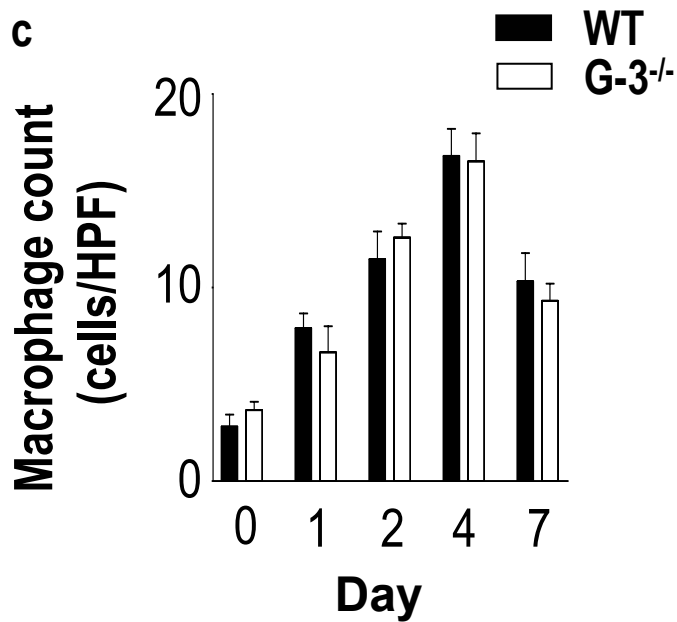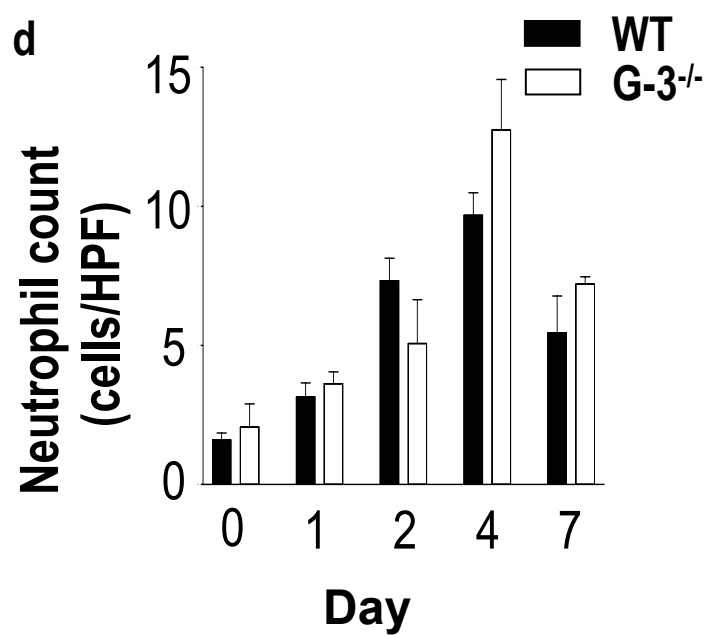

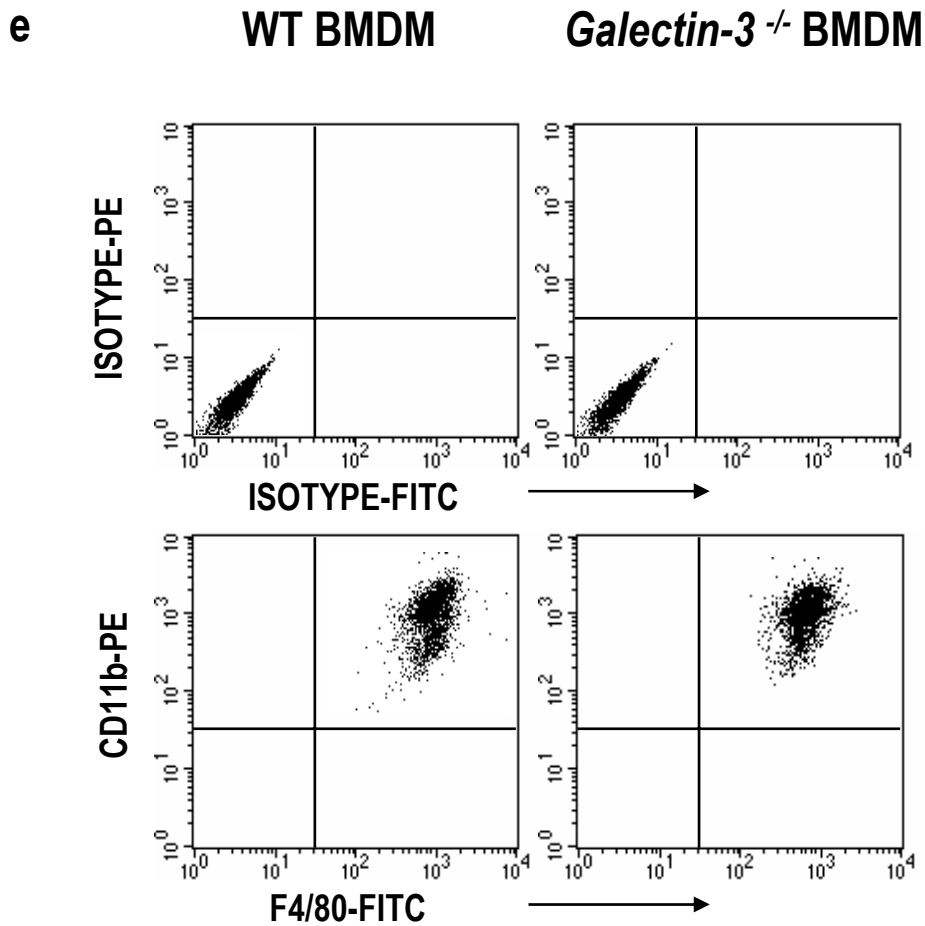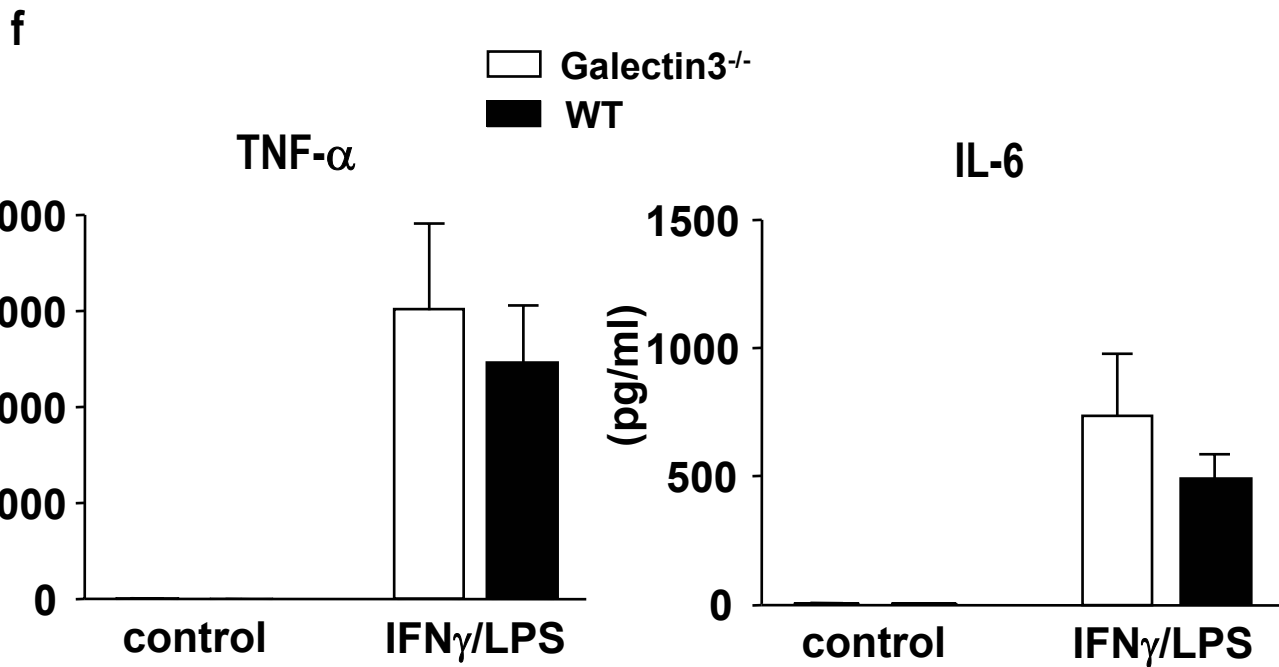

Supplement: pnas_0511167103_1.pdf [file pnas_0511167103_1.pdf]

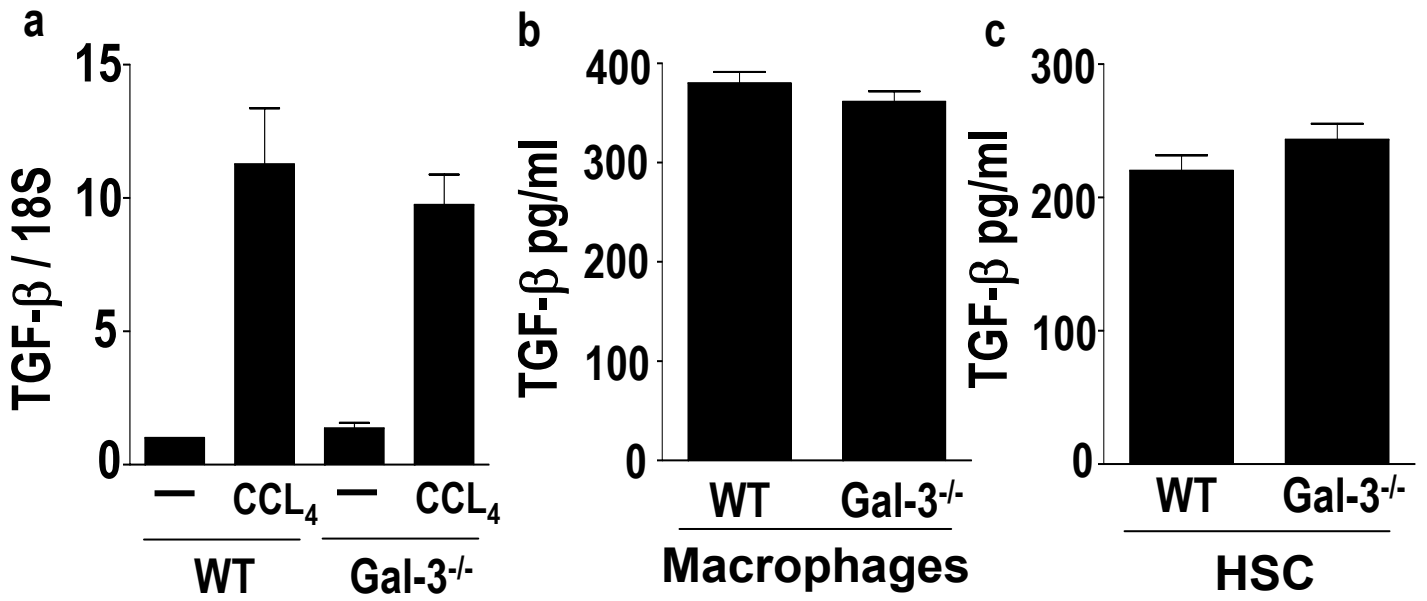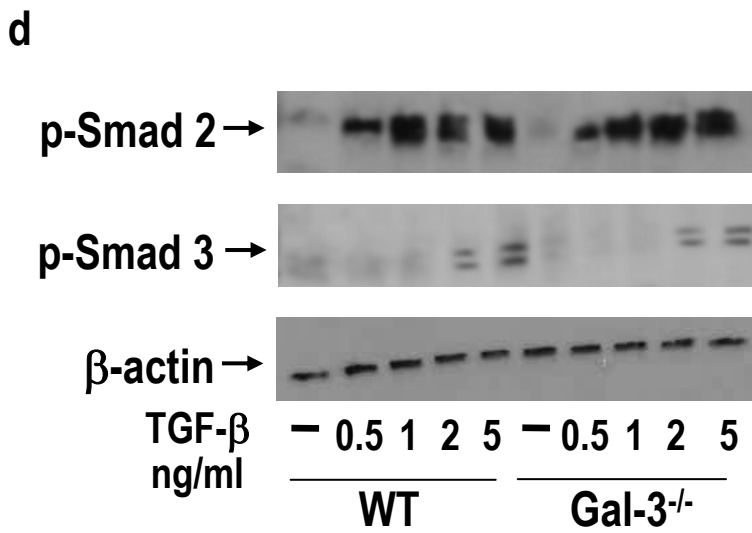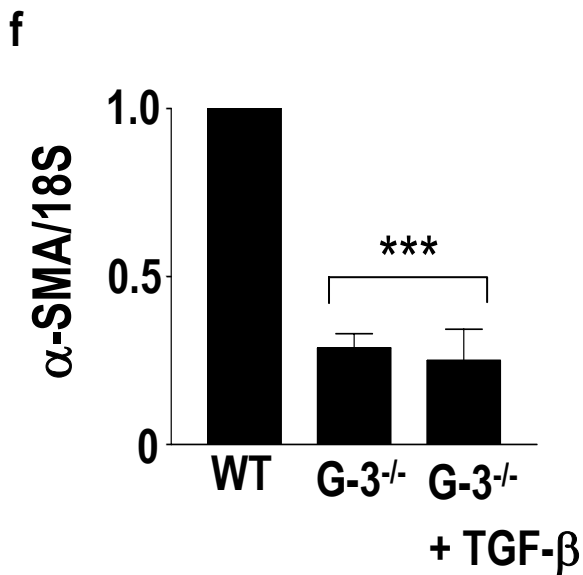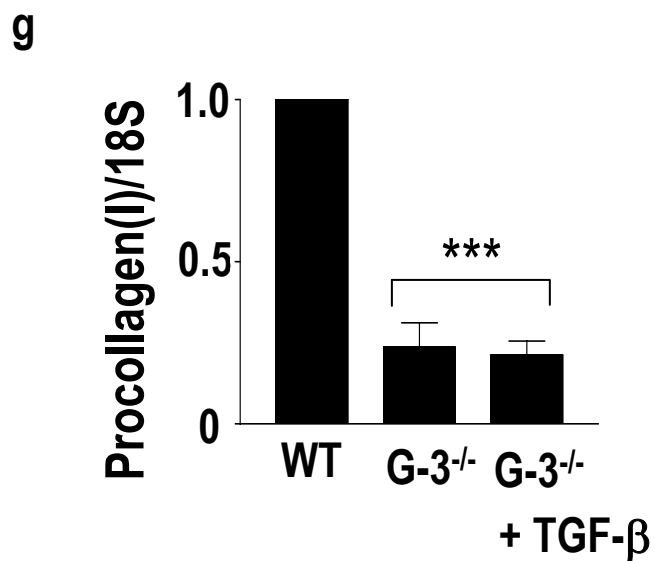

h

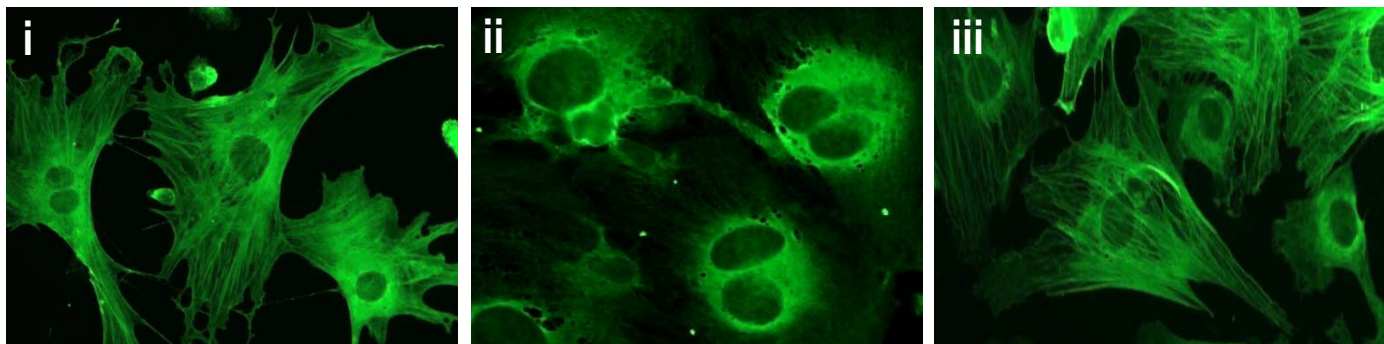

WT

Galectin-3<sup>-/-</sup>Galectin-3<sup>-/-</sup>  
+rG-3SF media + TGF- $\beta$ 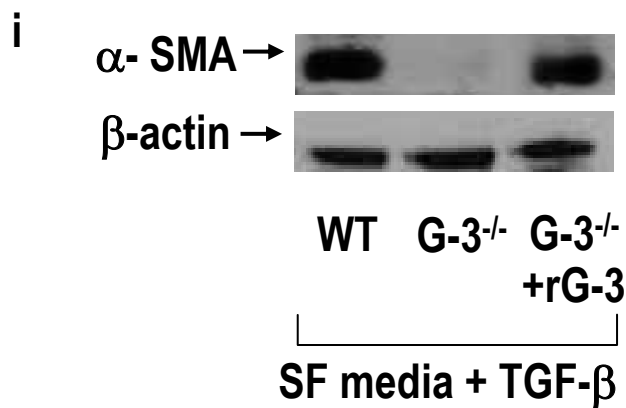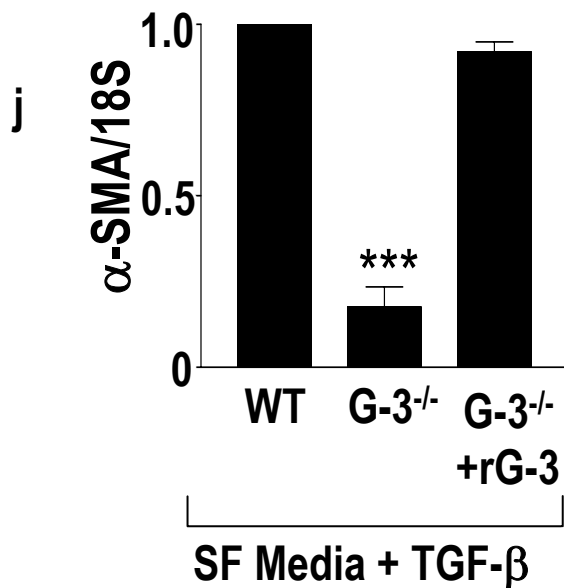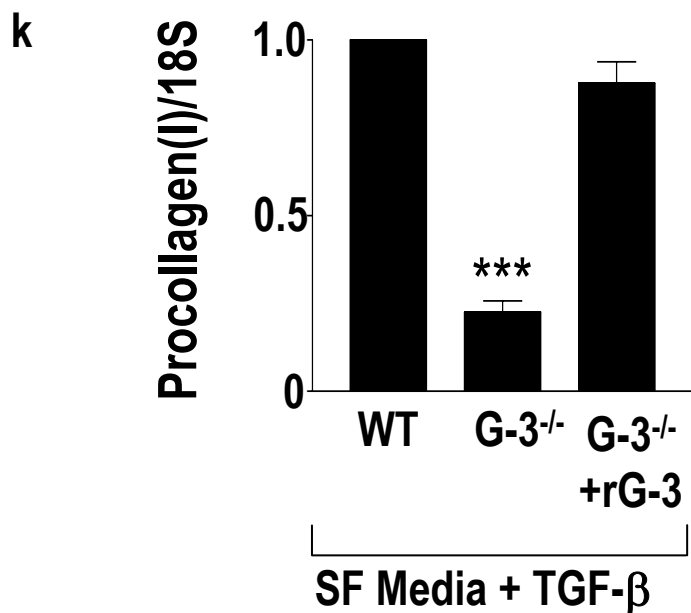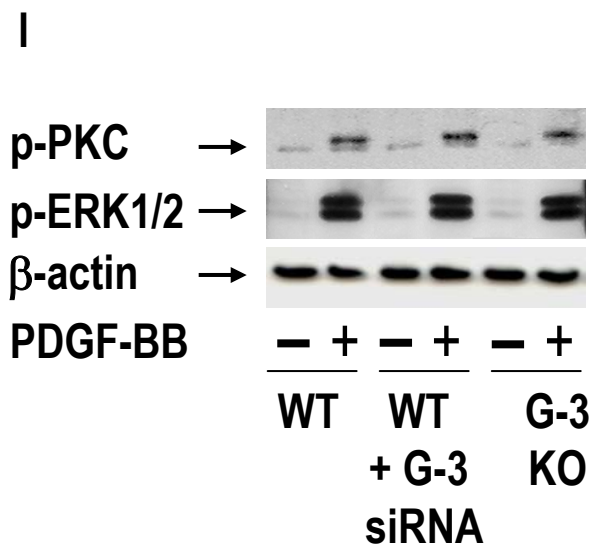

Supplement: pnas_0511167103_2.pdf [file pnas_0511167103_2.pdf]
